# Supplementary material for: A computational and conceptual DFT study on the mechanism of hydrogen activation by novel frustrated Lewis pairs
Source: Royal Society of Chemistry journal article supplement (doi:10.1039/c5cp00306g), 2015-01-01
Supplement: c5cp00306g1.pdf [file c5cp00306g1.pdf]

## Supplementary Material

### A Computational and Conceptual DFT Study on the Mechanism of Hydrogen Activation by Novel Frustrated Lewis Pairs

Patricia Pérez\*<sup>1</sup>, Diana Yepes<sup>1</sup>, Pablo Jaque<sup>1</sup>, Eduardo Chamorro<sup>1</sup>,  
Luis R. Domingo<sup>2</sup>, René S. Rojas<sup>3</sup> and Alejandro Toro-Labbé<sup>3</sup>

<sup>1</sup> Universidad Andres Bello, Facultad de Ciencias Exactas,  
Departamento de Ciencias Químicas, Laboratorio de Química Teórica,  
Av. República 275, 8370146 Santiago, Chile.

<sup>2</sup> Universidad de Valencia, Departamento de Química Orgánica,  
Dr. Moliner 50, E-46100 Burjassot, Valencia, Spain,

<sup>3</sup> Pontificia Universidad Católica de Chile, Facultad de Química, Santiago, Chile  
Nucleus Millennium Chemical Processes and Catalysis (CPC)

e-mail: [p.perez@unab.cl](mailto:p.perez@unab.cl)

#### Index

$\omega$ B97X-D/6-311G(d,p) gas phase total energies (in au), unique imaginary frequency (in  $\text{cm}^{-1}$ ), and cartesian coordinates of the structures involved in the activation of molecular hydrogen by the FLP models and the corresponding for the hydrogenation of acetylene.....S2

**Table S1.**  $\omega$ B97X-D/6-311G(d,p) total energies (E, in au), enthalpies (H, in au), entropies (S, in cal/mol K) and Gibbs free energies (G, in au), computed at 120°C and 1 atm in toluene, of the stationary points involved in the activation of molecular hydrogen **1** by the three FLP models **2**, **3** and **4** and for the hydrogenation of acetylene **8** by the three FLP models **2**, **3** and **4** to yield ethylene **9**.....S18

**Table S2.**  $\omega$ B97X-D/6-311G(d,p) total energies (E, in au) and enthalpies (H, in au), entropies (S, in cal/mol K) and Gibbs free energies (G, in au), in gas phase and computed at 120°C and 1 atm in toluene, for open-chain (O) and four-membered ring (R) forms of **2**, **3** and **4**.....S19

1, H<sub>2</sub>, Total Energy = -1.176071 a.u.

|   |            |            |             |
|---|------------|------------|-------------|
| H | 0.00000000 | 0.00000000 | 0.37258000  |
| H | 0.00000000 | 0.00000000 | -0.37258000 |

2, Total Energy = -1535.576750 a.u.

|   |             |             |             |
|---|-------------|-------------|-------------|
| C | -2.60511800 | -0.06481200 | -0.32574400 |
| C | -3.48241000 | 1.01743700  | -0.15615600 |
| C | -4.85001600 | 0.75587200  | -0.12186100 |
| C | -5.33945800 | -0.53366500 | -0.25640600 |
| C | -4.45714800 | -1.58341600 | -0.46289200 |
| C | -3.08391700 | -1.36919200 | -0.51930900 |
| H | -5.53890600 | 1.58481600  | 0.00325600  |
| H | -6.40724900 | -0.71654400 | -0.22449100 |
| H | -4.83652700 | -2.59061000 | -0.60023200 |
| N | -1.20865900 | 0.14150400  | -0.43743400 |
| C | -0.50870800 | 0.51552300  | 0.53356800  |
| N | 0.92013200  | 0.70281500  | 0.22699500  |
| B | 1.78566300  | -0.38487500 | 0.09066700  |
| C | -0.88473400 | 0.78882200  | 1.95495600  |
| H | -1.93463200 | 0.55355200  | 2.12462900  |
| H | -0.26346600 | 0.18214500  | 2.61546900  |
| H | -0.70602900 | 1.83962500  | 2.19648400  |
| C | -2.98294000 | 2.43612000  | -0.06879100 |
| H | -2.54896800 | 2.66195300  | 0.90965700  |
| H | -2.21328800 | 2.63277700  | -0.81767100 |
| H | -3.80315300 | 3.13671500  | -0.23091600 |
| C | -2.13688900 | -2.50617600 | -0.78569800 |
| H | -1.34228900 | -2.19801500 | -1.46887700 |
| H | -1.65443300 | -2.85017700 | 0.13121900  |
| H | -2.66791200 | -3.35195700 | -1.22544000 |
| C | 1.31099300  | 2.07148800  | 0.01055800  |
| F | 1.93215300  | 2.24022100  | -1.14669800 |
| F | 2.11643800  | 2.49828000  | 0.98477800  |
| F | 0.23506700  | 2.86262800  | 0.01416600  |
| C | 1.38576900  | -1.85506600 | 0.62993900  |
| C | 3.25584400  | -0.28536300 | -0.58788100 |
| F | 3.97930400  | -1.40389900 | -0.42772000 |
| F | 4.00195700  | 0.72582500  | -0.10724600 |
| F | 3.12247600  | -0.10267900 | -1.91639300 |
| F | 1.30652300  | -2.74876100 | -0.36812700 |
| F | 0.22465600  | -1.92760500 | 1.31664800  |
| F | 2.33482800  | -2.27685000 | 1.48847600  |

3, Total Energy = -2863.261202 a.u.

|   |             |             |             |
|---|-------------|-------------|-------------|
| C | -3.34568000 | -1.48751200 | 0.14071100  |
| C | -3.46153800 | -2.71703800 | 0.81560800  |
| C | -4.66886300 | -3.40893400 | 0.75106400  |
| C | -5.75294500 | -2.90096100 | 0.05976000  |
| C | -5.64025000 | -1.66284900 | -0.55087800 |
| C | -4.45715500 | -0.92718700 | -0.51799500 |
| H | -4.75621000 | -4.36425200 | 1.25742900  |
| H | -6.68539000 | -3.45146500 | 0.01358700  |
| H | -6.49760200 | -1.23973600 | -1.06418300 |
| C | -4.47873900 | 0.45907400  | -1.13984600 |
| C | -3.55270500 | 0.62226800  | -2.34762300 |
| C | -4.26215400 | 1.53404800  | -0.07192900 |
| H | -5.49700200 | 0.59402300  | -1.51908900 |
| H | -3.78035400 | -0.12529600 | -3.11231500 |
| H | -3.68216000 | 1.61219500  | -2.79455500 |
| H | -2.50240300 | 0.52201500  | -2.08125500 |
| H | -5.01362900 | 1.44430800  | 0.71605800  |
| H | -3.27983700 | 1.43140200  | 0.39068900  |
| H | -4.34716200 | 2.53186300  | -0.51083500 |
| C | -2.31865000 | -3.30430600 | 1.62781200  |
| C | -1.78760700 | -4.59729300 | 0.99777600  |
| C | -2.72804800 | -3.53610400 | 3.08696800  |
| H | -1.50708400 | -2.57891300 | 1.64192200  |
| H | -1.49011700 | -4.44132300 | -0.04243700 |
| H | -0.91833300 | -4.96570700 | 1.54819400  |
| H | -2.55192300 | -5.38044400 | 1.00627300  |
| H | -3.10390300 | -2.61479900 | 3.53761700  |
| H | -3.50926800 | -4.29726000 | 3.17229900  |
| H | -1.86745600 | -3.87650400 | 3.66954600  |
| N | -2.08648700 | -0.82203100 | 0.22135000  |
| C | -1.17196700 | -1.12599500 | -0.59289000 |
| N | 0.14257000  | -0.57253500 | -0.38017700 |
| C | 1.22807400  | -1.43342500 | -0.71410600 |
| C | 2.01920500  | -1.16262400 | -1.82563000 |
| C | 1.54235800  | -2.54628500 | 0.05709300  |
| C | 3.10126400  | -1.96080600 | -2.15379800 |
| C | 2.61228200  | -3.36502200 | -0.26647700 |
| C | 3.39494200  | -3.06797900 | -1.37178500 |
| B | 0.44591600  | 0.72763900  | 0.08212000  |
| C | -1.28598400 | -2.03140100 | -1.78936700 |
| H | -0.74338400 | -2.96693600 | -1.63837600 |
| H | -2.33131300 | -2.26729200 | -1.97682600 |
| H | -0.86191100 | -1.53283300 | -2.66457400 |
| F | 0.81284900  | -2.84399700 | 1.12210700  |
| F | 2.89334600  | -4.42358900 | 0.47980700  |
| F | 3.84951500  | -1.67909400 | -3.21094800 |
| F | 1.74563100  | -0.10982600 | -2.58641700 |

|   |             |             |             |
|---|-------------|-------------|-------------|
| F | 4.42245800  | -3.84170800 | -1.68099800 |
| C | 1.94105700  | 1.06599000  | 0.48090500  |
| C | 2.65353900  | 2.05969500  | -0.17754100 |
| C | 2.58726900  | 0.42986600  | 1.53231900  |
| C | 3.95219300  | 2.39612500  | 0.16780000  |
| C | 3.88150800  | 0.74407500  | 1.91072300  |
| C | 4.56525000  | 1.73418900  | 1.22086700  |
| C | -0.57969200 | 1.91652700  | 0.12218000  |
| C | -0.94715600 | 2.50646100  | 1.31952000  |
| C | -1.00665500 | 2.53009200  | -1.04338800 |
| C | -1.72945300 | 3.64736900  | 1.37161300  |
| C | -1.78943000 | 3.67083200  | -1.03168600 |
| C | -2.15097000 | 4.22808400  | 0.18441300  |
| F | -0.53668800 | 1.96082600  | 2.46721600  |
| F | -2.08606900 | 4.18103100  | 2.53360800  |
| F | -2.92725500 | 5.30231500  | 0.21253100  |
| F | -2.22013900 | 4.21436800  | -2.16507700 |
| F | -0.64900700 | 2.02225900  | -2.22711700 |
| F | 1.95287000  | -0.52286400 | 2.21917800  |
| F | 2.09515300  | 2.71141600  | -1.19859600 |
| F | 4.61076400  | 3.33903600  | -0.49388600 |
| F | 5.80448200  | 2.04556300  | 1.56684900  |
| F | 4.46814000  | 0.11503100  | 2.92161800  |

4, Total Energy = -2459.341635 a.u.

|   |            |             |             |
|---|------------|-------------|-------------|
| C | 3.16684700 | 1.65993300  | 0.30634100  |
| C | 3.15865500 | 3.03572400  | 0.63146500  |
| C | 4.37320500 | 3.70948500  | 0.70753600  |
| C | 5.57448300 | 3.05935500  | 0.47727100  |
| C | 5.56570800 | 1.70934000  | 0.18088300  |
| C | 4.37898800 | 0.98099000  | 0.09756400  |
| H | 4.38341500 | 4.76457000  | 0.95018100  |
| H | 6.51117600 | 3.60095000  | 0.53873800  |
| H | 6.50419700 | 1.19166000  | 0.01139900  |
| C | 4.48660200 | -0.49955800 | -0.22342200 |
| C | 3.99600800 | -0.81838200 | -1.63886900 |
| C | 3.84854800 | -1.38422000 | 0.84947600  |
| H | 5.55841400 | -0.72376500 | -0.21319600 |
| H | 4.54208200 | -0.22356900 | -2.37567900 |
| H | 4.15423900 | -1.87429800 | -1.87438000 |
| H | 2.93441500 | -0.60488100 | -1.76134100 |
| H | 4.28761700 | -1.17423000 | 1.82770800  |
| H | 2.77532700 | -1.21248400 | 0.92405100  |
| H | 4.02305800 | -2.43962400 | 0.62189500  |
| C | 1.85774900 | 3.75478900  | 0.96221400  |
| C | 1.93670500 | 5.27790200  | 0.85726400  |
| C | 1.36717100 | 3.33788700  | 2.35601000  |
| H | 1.10440700 | 3.44204600  | 0.23504000  |
| H | 2.33437100 | 5.59824300  | -0.10911500 |

|   |             |             |             |
|---|-------------|-------------|-------------|
| H | 0.93672600  | 5.70508000  | 0.96987000  |
| H | 2.56118900  | 5.70899600  | 1.64502000  |
| H | 1.21171500  | 2.25837800  | 2.41782400  |
| H | 2.10578100  | 3.61756700  | 3.11245900  |
| H | 0.42786600  | 3.84305100  | 2.60450500  |
| N | 1.91261000  | 0.98610500  | 0.30617300  |
| C | 1.12392400  | 1.10675000  | -0.67270100 |
| N | -0.21965000 | 0.60162300  | -0.52634500 |
| C | -1.23405200 | 1.59508100  | -0.76263600 |
| C | -1.99571800 | 1.54760400  | -1.92499800 |
| C | -1.45165600 | 2.58901700  | 0.18385800  |
| C | -2.97663600 | 2.50002400  | -2.14654700 |
| C | -2.42814900 | 3.54669500  | -0.03373000 |
| C | -3.19089800 | 3.50592700  | -1.20209800 |
| B | -0.59970000 | -0.68174300 | -0.11671200 |
| C | 1.40182500  | 1.77674800  | -1.98907200 |
| H | 0.83980000  | 2.70985200  | -2.07978800 |
| H | 2.46338000  | 1.99728200  | -2.08684900 |
| H | 1.08729000  | 1.11626400  | -2.80022300 |
| C | -2.12246500 | -0.93974500 | 0.23384900  |
| C | -2.92242300 | -1.70990000 | -0.59346500 |
| C | -2.71308500 | -0.42529000 | 1.37705300  |
| C | -4.25572200 | -1.96040100 | -0.31767800 |
| C | -4.04207600 | -0.65598000 | 1.69063900  |
| C | -4.81387800 | -1.42925900 | 0.83599100  |
| C | 0.37312600  | -1.91459600 | -0.08935000 |
| C | 0.52351400  | -2.68847700 | 1.05171300  |
| C | 1.00852200  | -2.35975900 | -1.23639800 |
| C | 1.29321400  | -3.83816700 | 1.07085300  |
| C | 1.78457400  | -3.50517000 | -1.25828600 |
| C | 1.92895900  | -4.24209000 | -0.09368900 |
| F | -0.06915000 | -2.30790300 | 2.18530800  |
| F | 1.44584700  | -4.54187900 | 2.18556700  |
| F | 2.69427000  | -5.32375800 | -0.08772700 |
| F | 2.40296500  | -3.89082800 | -2.36899300 |
| F | 0.87424100  | -1.67276000 | -2.37886200 |
| F | -1.99018400 | 0.32131800  | 2.21694400  |
| F | -2.40502100 | -2.20872500 | -1.72374400 |
| F | -4.99996200 | -2.69058900 | -1.13979200 |
| F | -6.08726600 | -1.65840300 | 1.12011200  |
| F | -4.58098500 | -0.15056800 | 2.79345600  |
| H | -0.87529700 | 2.58638300  | 1.09943300  |
| H | -2.61065200 | 4.31959400  | 0.70238800  |
| H | -1.81639500 | 0.75924300  | -2.64658600 |
| H | -3.57646300 | 2.47031500  | -3.04753700 |
| C | -4.20179800 | 4.49708800  | -1.43039200 |
| N | -5.01161200 | 5.29411000  | -1.61447900 |

**TS2/H<sub>2</sub>** Total Energy = -1536.749127 a.u.

Imaginary frequency : 383.4 cm<sup>-1</sup>

|   |             |             |             |
|---|-------------|-------------|-------------|
| C | -2.53029100 | 0.07191800  | 0.28523500  |
| C | -3.17313300 | -0.93603500 | 1.01743400  |
| C | -4.56008400 | -0.89281300 | 1.12166600  |
| C | -5.28927200 | 0.12180000  | 0.51925700  |
| C | -4.63130600 | 1.11287800  | -0.19286400 |
| C | -3.24431000 | 1.11063600  | -0.32092600 |
| H | -5.07048000 | -1.66660800 | 1.68545500  |
| H | -6.36887500 | 0.14427000  | 0.61197600  |
| H | -5.19820200 | 1.91112400  | -0.66035600 |
| N | -1.11267400 | 0.04520000  | 0.23724800  |
| H | 0.25475100  | 0.46026700  | 1.55534800  |
| C | -0.49236500 | -0.65134400 | -0.61807700 |
| N | 0.93835200  | -0.67557200 | -0.46859300 |
| B | 1.56907100  | 0.43649000  | 0.22359300  |
| C | -1.12147800 | -1.41564400 | -1.74530100 |
| H | -2.18797400 | -1.20037200 | -1.76837100 |
| H | -0.66249100 | -1.12153000 | -2.68935200 |
| H | -0.98334500 | -2.49120400 | -1.62618300 |
| H | 0.92988600  | 0.53892300  | 1.92626300  |
| C | -2.37894200 | -2.03261800 | 1.67647100  |
| H | -1.86909800 | -2.66485300 | 0.94302600  |
| H | -1.60679900 | -1.62200900 | 2.33304400  |
| H | -3.02865600 | -2.67368300 | 2.27360100  |
| C | -2.53376500 | 2.19008900  | -1.08783400 |
| H | -1.79636000 | 2.69581700  | -0.46212400 |
| H | -1.99256400 | 1.78414100  | -1.94638500 |
| H | -3.24481500 | 2.93152300  | -1.45485900 |
| C | 1.56920500  | -1.91670000 | -0.76184400 |
| F | 2.85867600  | -1.89275400 | -0.47861100 |
| F | 1.46401200  | -2.22679400 | -2.06312000 |
| F | 1.00870700  | -2.93000400 | -0.07957800 |
| C | 1.21545500  | 1.93457900  | -0.32802100 |
| C | 2.99626500  | 0.35396900  | 1.00500300  |
| F | 3.13002900  | 1.43166000  | 1.81062800  |
| F | 4.05235100  | 0.35264500  | 0.18082500  |
| F | 3.10005100  | -0.72074600 | 1.81309600  |
| F | 0.50126900  | 2.70884500  | 0.50444200  |
| F | 0.54951000  | 1.89274200  | -1.50388500 |
| F | 2.36251100  | 2.59552400  | -0.58833200 |

**TS3/H<sub>2</sub>** Total Energy = -2864.428559 a.u.

Imaginary frequency : 426.7cm<sup>-1</sup>

|   |            |             |             |
|---|------------|-------------|-------------|
| C | 3.14757500 | -1.78498000 | -0.31836000 |
| C | 2.99560300 | -3.01558000 | -0.98841000 |
| C | 4.11533100 | -3.82767500 | -1.15196400 |
| C | 5.35597300 | -3.44629900 | -0.67211100 |
| C | 5.49384100 | -2.21755700 | -0.04825400 |
| C | 4.41112000 | -1.35835000 | 0.12915600  |
| H | 4.01241200 | -4.77489700 | -1.66927100 |
| H | 6.21542300 | -4.09436200 | -0.79945500 |

|   |             |             |             |
|---|-------------|-------------|-------------|
| H | 6.46996600  | -1.90251000 | 0.30622000  |
| C | 4.67772300  | -0.00022100 | 0.75703800  |
| C | 4.00735900  | 0.18585200  | 2.12094300  |
| C | 4.36523900  | 1.14082400  | -0.21653200 |
| H | 5.75740400  | 0.03226100  | 0.93818800  |
| H | 4.32124600  | -0.59823100 | 2.81543100  |
| H | 4.28560300  | 1.15052100  | 2.55445200  |
| H | 2.92143100  | 0.16083300  | 2.05018800  |
| H | 4.93168100  | 1.02117600  | -1.14317400 |
| H | 3.30520800  | 1.16029200  | -0.46967600 |
| H | 4.63536000  | 2.10359600  | 0.22702500  |
| C | 1.67810500  | -3.42960400 | -1.62504000 |
| C | 1.31742300  | -4.89484600 | -1.36599700 |
| C | 1.70498900  | -3.11959700 | -3.12744000 |
| H | 0.87725600  | -2.82957600 | -1.19882100 |
| H | 1.35352200  | -5.13028700 | -0.29894300 |
| H | 0.30570400  | -5.09880000 | -1.72527300 |
| H | 1.99356600  | -5.58075700 | -1.88394300 |
| H | 1.91076800  | -2.06044500 | -3.30283700 |
| H | 2.48392500  | -3.69971200 | -3.63162600 |
| H | 0.74303900  | -3.36224600 | -3.58779200 |
| N | 1.99551100  | -0.96061700 | -0.19071100 |
| H | 0.97488300  | -0.19718400 | -1.42513000 |
| C | 1.08565100  | -1.24743800 | 0.66181500  |
| N | -0.11947700 | -0.54760300 | 0.55449200  |
| C | -1.29721700 | -1.07678600 | 1.12784100  |
| C | -2.08874800 | -0.28471300 | 1.95945900  |
| C | -1.77513500 | -2.35226200 | 0.83139700  |
| C | -3.29220100 | -0.73760300 | 2.47392800  |
| C | -2.96141700 | -2.83188700 | 1.36038600  |
| C | -3.72697000 | -2.02032300 | 2.18134200  |
| B | -0.22033800 | 0.64072900  | -0.32969600 |
| C | 1.22046800  | -2.27983300 | 1.74396300  |
| H | 0.87070100  | -3.25282000 | 1.39220600  |
| H | 2.27178200  | -2.38097500 | 2.00970100  |
| H | 0.64695800  | -1.99499100 | 2.62656700  |
| F | -1.09182400 | -3.15541300 | 0.02039100  |
| F | -3.37443800 | -4.05742600 | 1.06724200  |
| F | -4.02455200 | 0.04942900  | 3.24965700  |
| F | -1.71562800 | 0.95681900  | 2.24260700  |
| F | -4.86884300 | -2.46642500 | 2.68023500  |
| H | 0.34712800  | 0.12127600  | -1.80401100 |
| C | -1.67402900 | 0.92540700  | -0.92920300 |
| C | -2.37193100 | 2.10437300  | -0.69234400 |
| C | -2.33478800 | -0.03074500 | -1.69399800 |
| C | -3.65404300 | 2.32009800  | -1.17597900 |
| C | -3.61025100 | 0.14982100  | -2.19641700 |
| C | -4.27342800 | 1.33863300  | -1.93204400 |
| C | 0.75621700  | 1.87087100  | -0.07696600 |
| C | 1.09922400  | 2.73427300  | -1.10894200 |
| C | 1.26824900  | 2.18446700  | 1.17458100  |

|   |             |             |             |
|---|-------------|-------------|-------------|
| C | 1.92684600  | 3.82894400  | -0.93565300 |
| C | 2.10008100  | 3.27070200  | 1.38838800  |
| C | 2.43322300  | 4.09382000  | 0.32677300  |
| F | 0.62685800  | 2.50683100  | -2.34119700 |
| F | 2.24189300  | 4.61739700  | -1.95673100 |
| F | 3.24721100  | 5.12306700  | 0.51411300  |
| F | 2.60040000  | 3.51325500  | 2.59589700  |
| F | 0.98944300  | 1.42882400  | 2.24102400  |
| F | -1.72604300 | -1.19000000 | -1.97509100 |
| F | -1.83567900 | 3.07982900  | 0.03991900  |
| F | -4.29181800 | 3.45515600  | -0.91872900 |
| F | -5.49637600 | 1.53311300  | -2.40012600 |
| F | -4.19904900 | -0.79323300 | -2.92211700 |

**TS4/H<sub>2</sub>** Total Energy = -2860.507170 a.u.

Imaginary frequency : 450.6 cm<sup>-1</sup>

|   |             |             |             |
|---|-------------|-------------|-------------|
| C | 3.04052400  | -1.78187900 | -0.31446100 |
| C | 2.89512200  | -3.02952000 | -0.95344500 |
| C | 4.03194500  | -3.80783600 | -1.15815800 |
| C | 5.28020000  | -3.37820000 | -0.74105400 |
| C | 5.40663700  | -2.14016600 | -0.13174900 |
| C | 4.30517100  | -1.31509200 | 0.08464400  |
| H | 3.93840000  | -4.76608900 | -1.65693500 |
| H | 6.15400000  | -3.99893300 | -0.90203800 |
| H | 6.38636300  | -1.79362400 | 0.18112200  |
| C | 4.53838700  | 0.04942600  | 0.71330500  |
| C | 3.87780400  | 0.21165200  | 2.08637100  |
| C | 4.16862900  | 1.18727700  | -0.24426400 |
| H | 5.61885400  | 0.11670400  | 0.88014900  |
| H | 4.20092400  | -0.57819400 | 2.76986100  |
| H | 4.15338100  | 1.17306100  | 2.52887900  |
| H | 2.79070900  | 0.18018400  | 2.02110400  |
| H | 4.71538600  | 1.09428700  | -1.18565200 |
| H | 3.10212100  | 1.17362100  | -0.46939300 |
| H | 4.41764800  | 2.15487700  | 0.20155600  |
| C | 1.55955000  | -3.49708200 | -1.51553600 |
| C | 1.25673000  | -4.96648500 | -1.20779300 |
| C | 1.49824200  | -3.21794400 | -3.02270100 |
| H | 0.76257500  | -2.90660900 | -1.06172600 |
| H | 1.35670100  | -5.17958900 | -0.13989900 |
| H | 0.23618100  | -5.21293200 | -1.51447600 |
| H | 1.92708900  | -5.64207600 | -1.74585700 |
| H | 1.66279200  | -2.15720900 | -3.22717500 |
| H | 2.26851800  | -3.78542900 | -3.55343200 |
| H | 0.52264900  | -3.49828700 | -3.43013300 |
| N | 1.88232900  | -0.98135900 | -0.15075400 |
| H | 0.81189400  | -0.23882200 | -1.36457500 |
| C | 0.99195200  | -1.31029600 | 0.71070800  |
| N | -0.22300000 | -0.64182700 | 0.65324200  |
| C | -1.37280500 | -1.22718500 | 1.26348000  |



|   |             |             |             |
|---|-------------|-------------|-------------|
| C | -2.04035800 | -0.52953600 | 2.26599800  |
| C | -1.85879700 | -2.45831900 | 0.82910600  |
| C | -3.19282900 | -1.05322900 | 2.82836200  |
| C | -3.00380800 | -2.99210900 | 1.39371900  |
| C | -3.67665700 | -2.28847300 | 2.39487800  |
| B | -0.40252900 | 0.53827700  | -0.21236700 |
| C | 1.16860400  | -2.37198900 | 1.76139600  |
| H | 0.77986800  | -3.33362000 | 1.41797100  |
| H | 2.23000800  | -2.49634400 | 1.97119900  |
| H | 0.64008900  | -2.09984400 | 2.67526100  |
| H | 0.17122700  | 0.06512300  | -1.72635800 |
| C | -1.88295000 | 0.75657500  | -0.76945100 |
| C | -2.66732000 | 1.83489900  | -0.38396800 |
| C | -2.48203800 | -0.15946300 | -1.62525200 |
| C | -3.96942800 | 2.00786400  | -0.82601100 |
| C | -3.77628300 | -0.02025400 | -2.09278500 |
| C | -4.52310300 | 1.07625000  | -1.68963800 |
| C | 0.52325300  | 1.81367400  | 0.01447200  |
| C | 0.84761600  | 2.67480700  | -1.02463500 |
| C | 1.01506100  | 2.15718700  | 1.26543100  |
| C | 1.65233700  | 3.78854600  | -0.85754200 |
| C | 1.82712300  | 3.25820500  | 1.47396500  |
| C | 2.15042900  | 4.07490000  | 0.40335300  |
| F | 0.39088200  | 2.42290200  | -2.25714800 |
| F | 1.95702800  | 4.57220700  | -1.88500700 |
| F | 2.94269400  | 5.12215700  | 0.58322600  |
| F | 2.30888200  | 3.52815300  | 2.68289100  |
| F | 0.71724200  | 1.41746100  | 2.34351100  |
| F | -1.79636100 | -1.23677100 | -2.03324800 |
| F | -2.19195300 | 2.73830700  | 0.47901900  |
| F | -4.69049600 | 3.04752100  | -0.42399400 |
| F | -5.76514200 | 1.22791200  | -2.12240000 |
| F | -4.30570600 | -0.91911600 | -2.91407600 |
| H | -1.35239800 | -2.98121800 | 0.02671400  |
| H | -3.39066700 | -3.94450600 | 1.05326600  |
| H | -1.64582800 | 0.42248600  | 2.59891100  |
| H | -3.71769300 | -0.51220100 | 3.60576900  |
| C | -4.86828400 | -2.83557400 | 2.97479000  |
| N | -5.82442900 | -3.27632500 | 3.44030600  |

5, Total Energy = -1536.812453 a.u.

|   |             |             |             |
|---|-------------|-------------|-------------|
| C | -2.71025400 | 0.13915100  | 0.27039700  |
| C | -3.31021800 | -0.47467100 | 1.37202100  |
| C | -4.70034500 | -0.45076300 | 1.44410900  |
| C | -5.44937300 | 0.17406300  | 0.45686400  |
| C | -4.82407400 | 0.78763300  | -0.61926200 |
| C | -3.43632600 | 0.78298500  | -0.73343200 |
| H | -5.19567200 | -0.91932300 | 2.28717400  |
| H | -6.53058200 | 0.18991800  | 0.53186600  |

|   |             |             |             |
|---|-------------|-------------|-------------|
| H | -5.41633200 | 1.28207200  | -1.38118900 |
| N | -1.27777900 | 0.15703400  | 0.19041200  |
| H | -0.80289700 | 0.97162500  | 0.56252300  |
| C | -0.51898000 | -0.75910400 | -0.38185600 |
| N | 0.80893600  | -0.61709600 | -0.34625700 |
| B | 1.49752400  | 0.48040800  | 0.59982000  |
| C | -1.21662800 | -1.90779400 | -1.04854100 |
| H | -2.18553100 | -2.06614300 | -0.57977100 |
| H | -1.38291600 | -1.66800600 | -2.10023800 |
| H | -0.63081700 | -2.81997700 | -0.99164300 |
| H | 0.73270400  | 0.66730400  | 1.51143100  |
| C | -2.47556500 | -1.14411900 | 2.43009500  |
| H | -1.96864800 | -2.03099100 | 2.03609800  |
| H | -1.69957700 | -0.47526700 | 2.80984300  |
| H | -3.09611600 | -1.46105300 | 3.26856200  |
| C | -2.73624000 | 1.44398600  | -1.89011700 |
| H | -1.96979700 | 2.14373100  | -1.55056300 |
| H | -2.23392000 | 0.70714400  | -2.52449600 |
| H | -3.44774000 | 1.98778200  | -2.51184800 |
| C | 1.59107400  | -1.47070900 | -1.19202700 |
| F | 2.82823200  | -1.03732600 | -1.26851800 |
| F | 1.09638400  | -1.50483500 | -2.44283300 |
| F | 1.61890100  | -2.73818200 | -0.75446900 |
| C | 1.65037300  | 1.86798300  | -0.22362400 |
| C | 2.86645800  | -0.01802600 | 1.32164700  |
| F | 2.99990100  | 0.58018100  | 2.52916800  |
| F | 4.02477100  | 0.22685200  | 0.67264000  |
| F | 2.84850500  | -1.35773400 | 1.57316900  |
| F | 0.39791500  | 2.40667200  | -0.49317300 |
| F | 2.23809700  | 1.76492100  | -1.43390600 |
| F | 2.30759600  | 2.82455100  | 0.44974600  |

6, Total Energy = -2864.478830 a. u.

|   |            |             |             |
|---|------------|-------------|-------------|
| C | 3.32246500 | -1.69479300 | -0.28470700 |
| C | 3.18177200 | -2.93687500 | -0.92381100 |
| C | 4.31499700 | -3.73923900 | -1.03970000 |
| C | 5.53979000 | -3.31479300 | -0.55381300 |
| C | 5.65824600 | -2.06614900 | 0.03548800  |
| C | 4.55855300 | -1.22208000 | 0.17785000  |
| H | 4.23853000 | -4.70365100 | -1.52737600 |
| H | 6.41105100 | -3.95277200 | -0.64883000 |
| H | 6.62573400 | -1.72911400 | 0.39156400  |
| C | 4.77896200 | 0.15216100  | 0.79144300  |
| C | 4.08884800 | 0.32787400  | 2.14736200  |
| C | 4.45125500 | 1.29213600  | -0.18117100 |
| H | 5.85574000 | 0.21149500  | 0.98067500  |
| H | 4.40285700 | -0.45127300 | 2.84735800  |
| H | 4.35162100 | 1.29604500  | 2.58066900  |
| H | 3.00376500 | 0.30004300  | 2.06136100  |

|   |             |             |             |
|---|-------------|-------------|-------------|
| H | 4.96693600  | 1.15483800  | -1.13459700 |
| H | 3.38079200  | 1.37065800  | -0.37528700 |
| H | 4.77184000  | 2.24697400  | 0.24426800  |
| C | 1.87407600  | -3.37239400 | -1.56588000 |
| C | 1.55205200  | -4.85131200 | -1.33777700 |
| C | 1.89364300  | -3.02928900 | -3.06154200 |
| H | 1.05312300  | -2.80297700 | -1.13187000 |
| H | 1.60921500  | -5.11535700 | -0.27826600 |
| H | 0.53940800  | -5.06522900 | -1.68643000 |
| H | 2.23273600  | -5.50812700 | -1.88615500 |
| H | 2.05743000  | -1.96017600 | -3.21900300 |
| H | 2.69236000  | -3.57276400 | -3.57519400 |
| H | 0.93991500  | -3.29486400 | -3.52406200 |
| N | 2.14566400  | -0.87548100 | -0.15256200 |
| H | 1.91993600  | -0.25994600 | -0.92725000 |
| C | 1.11264800  | -1.19308100 | 0.62735100  |
| N | -0.04769700 | -0.59104700 | 0.42774200  |
| C | -1.20496200 | -1.06054800 | 1.09492000  |
| C | -2.00173200 | -0.21276100 | 1.86160800  |
| C | -1.68115600 | -2.35148500 | 0.87176500  |
| C | -3.21495400 | -0.63569400 | 2.38162600  |
| C | -2.87988800 | -2.79469200 | 1.40096600  |
| C | -3.65464500 | -1.92986100 | 2.15654200  |
| B | -0.18382400 | 0.56711100  | -0.67472800 |
| C | 1.32803200  | -2.19438800 | 1.71591000  |
| H | 1.15824200  | -3.20372900 | 1.33548900  |
| H | 2.35539100  | -2.13267000 | 2.07115200  |
| H | 0.64360800  | -2.00750400 | 2.54164700  |
| F | -0.97864100 | -3.20285400 | 0.12575400  |
| F | -3.29168600 | -4.03507000 | 1.17683800  |
| F | -3.95478100 | 0.19762800  | 3.09864100  |
| F | -1.63727000 | 1.03893400  | 2.08282300  |
| F | -4.80593200 | -2.33936500 | 2.66369300  |
| H | 0.34099000  | 0.11903400  | -1.67905500 |
| C | -1.74603500 | 0.79342300  | -1.03017500 |
| C | -2.49362900 | 1.92909400  | -0.75121500 |
| C | -2.43050000 | -0.22344400 | -1.68577700 |
| C | -3.83552400 | 2.04861800  | -1.08833200 |
| C | -3.76812300 | -0.15071800 | -2.03053400 |
| C | -4.47589400 | 1.00274600  | -1.72975100 |
| C | 0.65508800  | 1.89091600  | -0.23335400 |
| C | 0.96049500  | 2.81930600  | -1.22270000 |
| C | 1.17064800  | 2.18407800  | 1.02038300  |
| C | 1.73010100  | 3.94923600  | -1.00454900 |
| C | 1.95290000  | 3.29839400  | 1.28305000  |
| C | 2.23641600  | 4.18732500  | 0.26343200  |
| F | 0.49809900  | 2.63030700  | -2.46470800 |
| F | 1.99410100  | 4.79968100  | -1.99274200 |
| F | 3.00018600  | 5.25035000  | 0.49267800  |
| F | 2.45935400  | 3.49937700  | 2.49935700  |
| F | 0.97482900  | 1.35885700  | 2.06623400  |

|   |             |             |             |
|---|-------------|-------------|-------------|
| F | -1.78866900 | -1.36516600 | -1.98721500 |
| F | -1.94921700 | 2.97385600  | -0.12033500 |
| F | -4.51237100 | 3.15574500  | -0.79631200 |
| F | -5.76033600 | 1.10045500  | -2.05212600 |
| F | -4.37672700 | -1.16485100 | -2.64178900 |

7, Total Energy = -2460.559495 a.u.

|   |             |             |             |
|---|-------------|-------------|-------------|
| C | 3.25288600  | -1.64836500 | -0.19579300 |
| C | 3.20047000  | -2.86432300 | -0.89429900 |
| C | 4.38019400  | -3.59628300 | -1.01657800 |
| C | 5.56495400  | -3.13006200 | -0.47251400 |
| C | 5.59456600  | -1.91182800 | 0.18981600  |
| C | 4.44485800  | -1.13864600 | 0.33890300  |
| H | 4.37285300  | -4.53807000 | -1.55380500 |
| H | 6.47447900  | -3.71125300 | -0.57532500 |
| H | 6.52989600  | -1.54438300 | 0.59842900  |
| C | 4.56106300  | 0.21013400  | 1.03544200  |
| C | 3.75477600  | 0.30663300  | 2.33554800  |
| C | 4.26758400  | 1.38109600  | 0.08781400  |
| H | 5.61589000  | 0.29684400  | 1.31717600  |
| H | 3.99972800  | -0.51928600 | 3.01013700  |
| H | 3.98954900  | 1.24274500  | 2.85082200  |
| H | 2.67973600  | 0.30156700  | 2.15449000  |
| H | 4.87811000  | 1.31643800  | -0.81697600 |
| H | 3.21596900  | 1.41255100  | -0.20750000 |
| H | 4.49164600  | 2.33051900  | 0.58496200  |
| C | 1.93077300  | -3.35377000 | -1.57518900 |
| C | 1.63435400  | -4.82957200 | -1.29037300 |
| C | 2.00796500  | -3.07892200 | -3.08265900 |
| H | 1.08199200  | -2.77722300 | -1.20105400 |
| H | 1.60870800  | -5.03454300 | -0.21660500 |
| H | 0.66539000  | -5.10419800 | -1.71573300 |
| H | 2.38351300  | -5.48935900 | -1.73672000 |
| H | 2.16223500  | -2.01471400 | -3.27906100 |
| H | 2.83650800  | -3.63045600 | -3.53809200 |
| H | 1.07950100  | -3.38239500 | -3.57356400 |
| N | 2.03946700  | -0.89151300 | -0.06640200 |
| H | 1.81131600  | -0.24953600 | -0.81726800 |
| C | 1.00018500  | -1.27566200 | 0.68180300  |
| N | -0.16913900 | -0.70918300 | 0.49200500  |
| C | -1.31104300 | -1.21211600 | 1.19342700  |
| C | -1.90875200 | -0.46666300 | 2.20367800  |
| C | -1.86608000 | -2.42210200 | 0.78671100  |
| C | -3.05606800 | -0.94182800 | 2.81821700  |
| H | -1.48021400 | 0.48388300  | 2.49038100  |
| C | -3.01111400 | -2.90139800 | 1.39913900  |
| H | -1.41502900 | -2.96362300 | -0.03696600 |
| C | -3.60854100 | -2.16121100 | 2.42135400  |
| H | -3.53076100 | -0.36694700 | 3.60396800  |

|   |             |             |             |
|---|-------------|-------------|-------------|
| H | -3.45429000 | -3.83710000 | 1.08097700  |
| C | -4.79491700 | -2.65297200 | 3.05966000  |
| N | -5.74400400 | -3.05197000 | 3.57502300  |
| B | -0.37254600 | 0.42230200  | -0.61460800 |
| C | 1.21658900  | -2.32440800 | 1.72789500  |
| H | 0.87472900  | -3.29630500 | 1.36083600  |
| H | 2.27440600  | -2.40209800 | 1.97475300  |
| H | 0.64268000  | -2.07996400 | 2.62217000  |
| H | 0.16423100  | -0.00451900 | -1.61863700 |
| C | -1.94933100 | 0.57672300  | -0.93087300 |
| C | -2.77759000 | 1.55132500  | -0.39689600 |
| C | -2.56908300 | -0.33854700 | -1.77094600 |
| C | -4.13026800 | 1.63932500  | -0.68863200 |
| C | -3.91643300 | -0.29323800 | -2.08494300 |
| C | -4.70130800 | 0.71144400  | -1.54269300 |
| C | 0.40064700  | 1.79966400  | -0.21173700 |
| C | 0.82277200  | 2.17842200  | 1.05291300  |
| C | 0.74305600  | 2.68211100  | -1.23076200 |
| C | 1.56902400  | 3.31673000  | 1.30543800  |
| C | 1.47349300  | 3.84212700  | -1.02514800 |
| C | 1.89822100  | 4.15633100  | 0.25550100  |
| F | -1.86170200 | -1.35576400 | -2.28907200 |
| F | -4.46513900 | -1.20213000 | -2.88797700 |
| F | -5.99610900 | 0.77508800  | -1.82904000 |
| F | -4.88391300 | 2.59250800  | -0.14726100 |
| F | -2.29501200 | 2.44625800  | 0.47693900  |
| F | 0.37203500  | 2.41747200  | -2.48891700 |
| F | 1.77734900  | 4.64813500  | -2.04030400 |
| F | 2.62700300  | 5.24569500  | 0.47207000  |
| F | 1.99329100  | 3.59378700  | 2.53765100  |
| F | 0.54533900  | 1.41202400  | 2.13008100  |

**TS2-H<sub>2</sub>/8** Total Energy = -1614.079313 a.u.

Imaginary frequency : 1506.0cm<sup>-1</sup>

|   |             |             |             |
|---|-------------|-------------|-------------|
| C | -2.71047400 | -0.07097200 | -0.11390900 |
| C | -3.37922900 | -0.11787000 | -1.34054200 |
| C | -4.77134800 | -0.13410700 | -1.32668600 |
| C | -5.46792300 | -0.13261700 | -0.12660500 |
| C | -4.78086400 | -0.12053500 | 1.07874400  |
| C | -3.38857900 | -0.09654300 | 1.10793200  |
| H | -5.31022900 | -0.15763700 | -2.26781800 |
| H | -6.55177300 | -0.15166200 | -0.13072700 |
| H | -5.32837200 | -0.13595900 | 2.01508500  |
| N | -1.28059900 | -0.12114200 | -0.12124900 |
| H | -1.04385600 | -1.37850000 | -0.15344100 |
| C | -0.55929100 | 0.95792100  | -0.04060200 |
| N | 0.79991200  | 0.87132400  | -0.05727700 |
| B | 1.54498200  | -0.50064600 | -0.12058500 |

|   |             |             |             |
|---|-------------|-------------|-------------|
| C | -1.24221700 | 2.29826300  | 0.06329800  |
| H | -2.27029300 | 2.21232700  | -0.27768600 |
| H | -1.24812300 | 2.62254800  | 1.10494700  |
| H | -0.73307800 | 3.05731000  | -0.52359000 |
| H | 0.75427700  | -1.31770700 | -0.71926700 |
| C | -0.88132600 | -2.70292100 | -0.37541500 |
| C | 0.31330000  | -2.72933000 | -0.75095700 |
| H | -1.67068700 | -3.42869900 | -0.27301800 |
| C | -2.60157800 | -0.11929200 | -2.62885900 |
| H | -2.07308500 | 0.82830000  | -2.77427300 |
| H | -1.84655700 | -0.90970200 | -2.63444300 |
| H | -3.26462700 | -0.26786000 | -3.48206100 |
| C | -2.62986300 | -0.09382900 | 2.40757500  |
| H | -1.84072300 | -0.84806300 | 2.41062900  |
| H | -2.14559900 | 0.87151700  | 2.58535900  |
| H | -3.30079700 | -0.28692700 | 3.24551700  |
| C | 1.56066800  | 2.06687800  | 0.11296800  |
| F | 2.84290800  | 1.78226200  | 0.24789400  |
| F | 1.19159800  | 2.75515200  | 1.20652500  |
| F | 1.44499100  | 2.90773200  | -0.92926100 |
| C | 1.81792600  | -1.08817300 | 1.36708500  |
| C | 2.83533700  | -0.57461400 | -1.12376300 |
| F | 2.91749100  | -1.80611800 | -1.71197400 |
| F | 4.03728700  | -0.38077100 | -0.55704600 |
| F | 2.73551900  | 0.30480400  | -2.14766400 |
| F | 2.39364300  | -2.31137500 | 1.35446300  |
| F | 0.66458400  | -1.21975200 | 2.08071400  |
| F | 2.61308200  | -0.29675800 | 2.11633900  |
| H | 1.25625300  | -3.12745800 | -1.07410600 |

**TS3-H<sub>2</sub>/8** Total Energy = -2941.751243 a.u.

Imaginary frequency : 995.5 cm<sup>-1</sup>

|   |            |             |             |
|---|------------|-------------|-------------|
| C | 3.42529600 | -1.46100400 | -0.22554200 |
| C | 3.46629300 | -2.76220100 | -0.75485400 |
| C | 4.68855900 | -3.43169600 | -0.76605400 |
| C | 5.83888000 | -2.82610900 | -0.29590000 |
| C | 5.78362100 | -1.52458700 | 0.17497900  |
| C | 4.58929300 | -0.80696300 | 0.21145800  |
| H | 4.73905500 | -4.43699500 | -1.16872400 |
| H | 6.78297300 | -3.35852600 | -0.31264800 |
| H | 6.69125600 | -1.04140600 | 0.52050500  |
| C | 4.64928700 | 0.61986800  | 0.73686900  |
| C | 4.01196400 | 0.74871100  | 2.12298400  |
| C | 4.13331300 | 1.66928700  | -0.25302300 |
| H | 5.71624700 | 0.82672300  | 0.86957400  |
| H | 4.47148900 | 0.04786100  | 2.82547600  |
| H | 4.14872100 | 1.75944100  | 2.51507400  |
| H | 2.94150800 | 0.55274000  | 2.09948200  |

|   |             |             |             |
|---|-------------|-------------|-------------|
| H | 4.62949100  | 1.56744600  | -1.22077600 |
| H | 3.06051100  | 1.59029300  | -0.42397600 |
| H | 4.33995700  | 2.67137600  | 0.13418500  |
| C | 2.25297900  | -3.44681700 | -1.36565200 |
| C | 2.00034600  | -4.83129400 | -0.75830900 |
| C | 2.40303300  | -3.53487000 | -2.88957400 |
| H | 1.36723300  | -2.84202800 | -1.17680200 |
| H | 1.94256200  | -4.79058100 | 0.33262400  |
| H | 1.05765400  | -5.23805900 | -1.13183500 |
| H | 2.79228900  | -5.53796700 | -1.02161800 |
| H | 2.52724300  | -2.54151300 | -3.32506400 |
| H | 3.27000700  | -4.14292500 | -3.16575700 |
| H | 1.51276100  | -3.99088500 | -3.33096600 |
| N | 2.15813500  | -0.77520700 | -0.25918800 |
| H | 2.06518500  | -0.26030800 | -1.25564000 |
| C | 1.18357600  | -1.06491700 | 0.56734000  |
| N | -0.06301500 | -0.58468300 | 0.37272000  |
| C | -1.13894300 | -1.19945100 | 1.05997300  |
| C | -1.98291100 | -0.47913100 | 1.90344000  |
| C | -1.47151700 | -2.53089500 | 0.81529800  |
| C | -3.10480200 | -1.05839500 | 2.47443700  |
| C | -2.57373400 | -3.13154200 | 1.39747300  |
| C | -3.39814300 | -2.38954600 | 2.22796900  |
| B | -0.37943800 | 0.64383700  | -0.52620300 |
| C | 1.45579300  | -1.94058700 | 1.75472900  |
| H | 2.50799100  | -1.88167900 | 2.02376700  |
| H | 0.84196400  | -1.63454800 | 2.60071300  |
| H | 1.23136100  | -2.98103700 | 1.51017000  |
| F | -0.71539500 | -3.26605900 | 0.00393300  |
| F | -2.84872200 | -4.40542000 | 1.15276900  |
| F | -3.89444000 | -0.34171000 | 3.26149800  |
| F | -1.75587500 | 0.80260400  | 2.14952300  |
| F | -4.46071600 | -2.95012100 | 2.78287700  |
| H | 0.16399200  | 0.31721600  | -1.70284700 |
| C | -1.93320700 | 0.73058100  | -0.92446700 |
| C | -2.77976600 | 1.78607800  | -0.60551100 |
| C | -2.51594000 | -0.30927800 | -1.64281800 |
| C | -4.11985600 | 1.80670600  | -0.96575900 |
| C | -3.84767400 | -0.32817200 | -2.01711100 |
| C | -4.65566500 | 0.74490800  | -1.67469900 |
| C | 0.36821300  | 1.99386500  | -0.07889700 |
| C | 0.49489700  | 3.04661600  | -0.97897000 |
| C | 0.92623700  | 2.22078300  | 1.17224000  |
| C | 1.18189200  | 4.21398700  | -0.69773900 |
| C | 1.61100900  | 3.37950900  | 1.50001300  |
| C | 1.75403000  | 4.37678100  | 0.55317000  |
| F | -0.09029200 | 2.96500500  | -2.17871500 |
| F | 1.28687500  | 5.17950500  | -1.60481200 |
| F | 2.43008800  | 5.48150000  | 0.84221300  |
| F | 2.15034800  | 3.53016300  | 2.70802300  |
| F | 0.84339300  | 1.30169900  | 2.14937300  |

|   |             |             |             |
|---|-------------|-------------|-------------|
| F | -1.77295600 | -1.37134700 | -1.98766000 |
| F | -2.33928900 | 2.83451000  | 0.09078400  |
| F | -4.89434700 | 2.83338900  | -0.63264800 |
| F | -5.93483800 | 0.75221400  | -2.02271900 |
| F | -4.35422600 | -1.35363800 | -2.69478400 |
| C | 2.01457100  | 0.17859100  | -2.79098900 |
| C | 0.77231800  | 0.37002700  | -2.90196400 |
| H | 2.78475000  | 0.14715400  | -3.54776800 |
| H | -0.10077000 | 0.59457600  | -3.49500000 |

**TS4-H<sub>2</sub>/8** Total Energy = -2537.830553 a.u.

Imaginary frequency : 977.0 cm<sup>-1</sup>

|   |             |             |             |
|---|-------------|-------------|-------------|
| C | 3.31818900  | -1.49391900 | -0.21385200 |
| C | 3.35582500  | -2.78827800 | -0.75813800 |
| C | 4.58521000  | -3.44268900 | -0.81027500 |
| C | 5.73921000  | -2.82928000 | -0.35660700 |
| C | 5.68125200  | -1.53856300 | 0.14508200  |
| C | 4.47942600  | -0.83746600 | 0.22142000  |
| H | 4.64009300  | -4.44150500 | -1.22880300 |
| H | 6.68863200  | -3.34997400 | -0.40630100 |
| H | 6.59065200  | -1.05444300 | 0.48483800  |
| C | 4.51258000  | 0.57511300  | 0.78766500  |
| C | 3.83511300  | 0.66623200  | 2.15857100  |
| C | 4.00080100  | 1.64493300  | -0.18364900 |
| H | 5.57358300  | 0.79063700  | 0.95177600  |
| H | 4.26742300  | -0.05629100 | 2.85628300  |
| H | 3.96505400  | 1.66512000  | 2.58238000  |
| H | 2.76423500  | 0.47758300  | 2.09486900  |
| H | 4.50878800  | 1.57299600  | -1.14784400 |
| H | 2.93027600  | 1.55802500  | -0.36847800 |
| H | 4.19213900  | 2.63887700  | 0.23178700  |
| C | 2.12995100  | -3.47378100 | -1.34550600 |
| C | 1.89292900  | -4.86195400 | -0.73978900 |
| C | 2.24298000  | -3.55144500 | -2.87307700 |
| H | 1.24815500  | -2.86657900 | -1.13366400 |
| H | 1.84697600  | -4.82711000 | 0.35200600  |
| H | 0.95247900  | -5.27963800 | -1.11008700 |
| H | 2.68803700  | -5.56103800 | -1.01275600 |
| H | 2.35702700  | -2.55463100 | -3.30302100 |
| H | 3.10394000  | -4.15680700 | -3.17235000 |
| H | 1.34372700  | -4.00512900 | -3.29872900 |
| N | 2.05096800  | -0.81742400 | -0.21399400 |
| H | 1.93856800  | -0.28329600 | -1.19812100 |
| C | 1.08543100  | -1.15390300 | 0.61063700  |
| N | -0.16781600 | -0.71054200 | 0.43481800  |
| C | -1.22103900 | -1.33760700 | 1.17399400  |
| C | -1.93731000 | -0.62453200 | 2.13086800  |
| C | -1.57318500 | -2.64987300 | 0.87157400  |
| C | -2.99802900 | -1.22462300 | 2.78807500  |
| C | -2.62562400 | -3.25861300 | 1.53293900  |



|   |             |             |             |
|---|-------------|-------------|-------------|
| C | -3.34252000 | -2.54540900 | 2.49509200  |
| B | -0.53973100 | 0.50952800  | -0.43916000 |
| C | 1.39038400  | -2.04260700 | 1.78307700  |
| H | 2.45348500  | -2.01153200 | 2.00907500  |
| H | 0.81549500  | -1.72569300 | 2.65246900  |
| H | 1.12178000  | -3.07633400 | 1.55763700  |
| H | 0.00307200  | 0.22426100  | -1.63562000 |
| C | -2.10088800 | 0.54114200  | -0.80560000 |
| C | -2.99164100 | 1.50474200  | -0.35319900 |
| C | -2.64818800 | -0.45768200 | -1.60241000 |
| C | -4.33965600 | 1.49365100  | -0.67687900 |
| C | -3.98711700 | -0.50647900 | -1.94813000 |
| C | -4.83823300 | 0.48408100  | -1.48363200 |
| C | 0.16268200  | 1.88740300  | 0.00541100  |
| C | 0.28043200  | 2.94098100  | -0.89489300 |
| C | 0.70245400  | 2.12867700  | 1.26122700  |
| C | 0.96427900  | 4.11127600  | -0.61323100 |
| C | 1.38621400  | 3.28661300  | 1.59009700  |
| C | 1.53409700  | 4.27900500  | 0.63804600  |
| F | -0.30220300 | 2.85677400  | -2.09437900 |
| F | 1.06859400  | 5.07473200  | -1.52188500 |
| F | 2.20628400  | 5.38607000  | 0.92557100  |
| F | 1.90974200  | 3.44585300  | 2.80348400  |
| F | 0.57798200  | 1.22385500  | 2.25282400  |
| F | -1.86481600 | -1.44882500 | -2.05448300 |
| F | -2.58036500 | 2.47750900  | 0.46877800  |
| F | -5.15756900 | 2.43271400  | -0.21289900 |
| F | -6.12474600 | 0.45907600  | -1.80214000 |
| F | -4.46140300 | -1.48605500 | -2.71129600 |
| C | 1.85158800  | 0.17522300  | -2.72489700 |
| C | 0.59855600  | 0.30937700  | -2.82533000 |
| H | 2.60234200  | 0.18627400  | -3.50254200 |
| H | -0.28016100 | 0.49624300  | -3.42366100 |
| C | -4.43790700 | -3.16975200 | 3.17757500  |
| N | -5.31534800 | -3.67349500 | 3.72666800  |
| H | -3.56203500 | -0.67344200 | 3.53007400  |
| H | -1.66422500 | 0.39862700  | 2.35240700  |
| H | -2.90451700 | -4.27839500 | 1.29907900  |
| H | -1.03396900 | -3.17950700 | 0.09495000  |

8, Total Energy = -77.318631 a.u.

|   |            |            |             |
|---|------------|------------|-------------|
| C | 0.00000000 | 0.00000000 | 0.59821900  |
| C | 0.00000000 | 0.00000000 | -0.59821900 |
| H | 0.00000000 | 0.00000000 | 1.66217600  |
| H | 0.00000000 | 0.00000000 | -1.66217600 |

9, Total Energy = -78.578844 a.u.

|   |             |            |            |
|---|-------------|------------|------------|
| C | -0.66219500 | 0.00000000 | 0.00000000 |
| C | 0.66219500  | 0.00000000 | 0.00000000 |

|   |             |             |            |
|---|-------------|-------------|------------|
| H | -1.23108700 | -0.92410300 | 0.00000000 |
| H | -1.23108600 | 0.92410300  | 0.00000000 |
| H | 1.23108700  | 0.92410300  | 0.00000000 |
| H | 1.23108600  | -0.92410300 | 0.00000000 |

**Table S1.**  $\omega$ B97X-D/6-311G(d,p) total energies (E, in au), enthalpies (H, in au), entropies (S, in cal/mol K) and Gibbs free energies (G, in au), computed at 120°C and 1 atm in toluene, of the stationary points involved in the activation of molecular hydrogen **1** by the three FLP models **2**, **3** and **4** and for the hydrogenation of acetylene **8** by the three FLP models **2**, **3** and **4** to yield ethylene **9**.

|                             | E            | H            | S     | G             |
|-----------------------------|--------------|--------------|-------|---------------|
| <b>1</b>                    | -1.176144    | -1.161685    | 33.1  | -1.182391     |
| <b>2</b>                    | -1535.579977 | -1535.287075 | 195.6 | -1535.409570  |
| <b>3</b>                    | -2863.265642 | -2862.713703 | 318.8 | -2.862.913368 |
| <b>4</b>                    | -2459.348201 | -2458.760987 | 306.3 | -2458.952800  |
| <b>TS2/H<sub>2</sub></b>    | -1536.752218 | -1536.443029 | 195.2 | -1536.565286  |
| <b>TS3/H<sub>2</sub></b>    | -2864.432675 | -2863.864797 | 319.9 | -2.864.065167 |
| <b>TS4/H<sub>2</sub></b>    | -2460.513553 | -2459.910776 | 309.4 | -2460.104548  |
| <b>5</b>                    | -1536.820217 | -1536.505014 | 195.1 | -1536.627229  |
| <b>6</b>                    | -2864.484861 | -2863.910049 | 318.1 | -2.864.109259 |
| <b>7</b>                    | -2460.567962 | -2459.959379 | 306.5 | -2460.151347  |
| <b>8</b>                    | -77.320353   | -77.287807   | 50.7  | -77.319561    |
| <b>TS2- H<sub>2</sub>/8</b> | -1614.084333 | -1613.740713 | 209.0 | -1613.871585  |
| <b>TS3- H<sub>2</sub>/8</b> | -2941.756186 | -2941.153721 | 329.1 | -2941.359844  |
| <b>TS4- H<sub>2</sub>/8</b> | -253.837780  | -2537.199933 | 318.6 | -2537.39945   |
| <b>9</b>                    | -78.580125   | -78.523287   | 56.7  | -78.558809    |

**Table S2.**  $\omega$ B97X-D/6-311G(d,p) total energies (E, in au) and enthalpies (H, in au), entropies (S, in cal/mol K) and Gibbs free energies (G, in au), in gas phase and computed at 120°C and 1 atm in toluene, for open-chain (**O**) and four-membered ring (**R**) forms of **2**, **3** and **4**.

|          | E            | $\Delta E$ | E            | $\Delta E$ | H            | $\Delta H$ | S     | $\Delta S$ | G            | $\Delta G$ |
|----------|--------------|------------|--------------|------------|--------------|------------|-------|------------|--------------|------------|
|          | Gas phase    | Ⓢ          |              | Ⓢ          | Toluene      | Ⓢ          |       | Ⓢ          |              | Ⓢ          |
| <b>2</b> |              |            |              |            |              |            |       |            |              |            |
| <b>O</b> | -1535.579948 |            | -1535.579977 |            | -1535.287075 |            | 195.6 |            | -1535.409570 |            |
| <b>R</b> | -1535.623057 | -27.1      | -1535.627946 | -30.1      | -1535.334533 | -29.8      | 195.0 | -0.6       | -1535.456627 | -29.5      |
| <b>3</b> |              |            |              |            |              |            |       |            |              |            |
| <b>O</b> | -2863.261203 |            | -2863.265642 |            | -2862.713703 |            | 318.8 |            | -2862.913368 |            |
| <b>R</b> | -2863.283474 | -14.0      | -2863.288090 | -14.1      | -2862.736714 | -14.4      | 320.2 | 1.4        | -2862.937239 | -15.0      |
| <b>4</b> |              |            |              |            |              |            |       |            |              |            |
| <b>O</b> | -2459.341634 |            | -2459.348201 |            | -2458.760987 |            | 306.3 |            | -2458.952799 |            |
| <b>R</b> | -2459.363721 | -13.9      | -2459.371775 | -14.8      | -2458.785992 | -15.7      | 298.0 | -8.2       | -2458.972654 | -12.5      |
